# Supplementary material
Source: PubMed Central journal article supplement (PMC7250783)
Supplement: mmc1.pdf [file mmc1.pdf]

**Cell Host & Microbe, Volume 28**

## **Supplemental Information**

### **A Mouse Model of SARS-CoV-2**

#### **Infection and Pathogenesis**

**Shi-Hui Sun, Qi Chen, Hong-Jing Gu, Guan Yang, Yan-Xiao Wang, Xing-Yao Huang, Su-Su Liu, Na-Na Zhang, Xiao-Feng Li, Rui Xiong, Yan Guo, Yong-Qiang Deng, Wei-Jin Huang, Quan Liu, Quan-Ming Liu, Yue-Lei Shen, Yong Zhou, Xiao Yang, Tong-Yan Zhao, Chang-Fa Fan, Yu-Sen Zhou, Cheng-Feng Qin, and You-Chun Wang**

## Supplemental Information

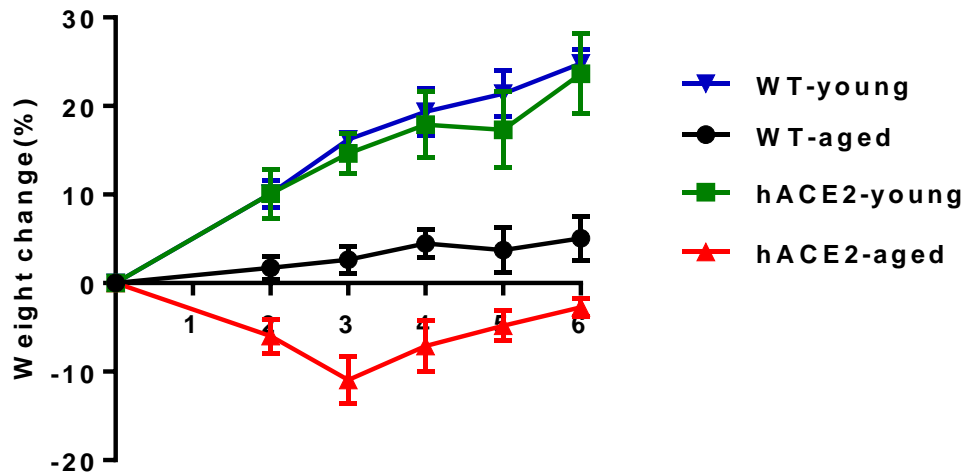

**Figure S1. Weight change of mice infected with SARS-CoV-2.** Wild-type C57BL/6 mice, young (4.5 weeks old) and aged (30 weeks old) hACE2 humanized mice (n=3) were intranasally infected with  $4 \times 10^5$  pfu of SARS-CoV-2 and monitored daily for weight change. Related to Figure 2.

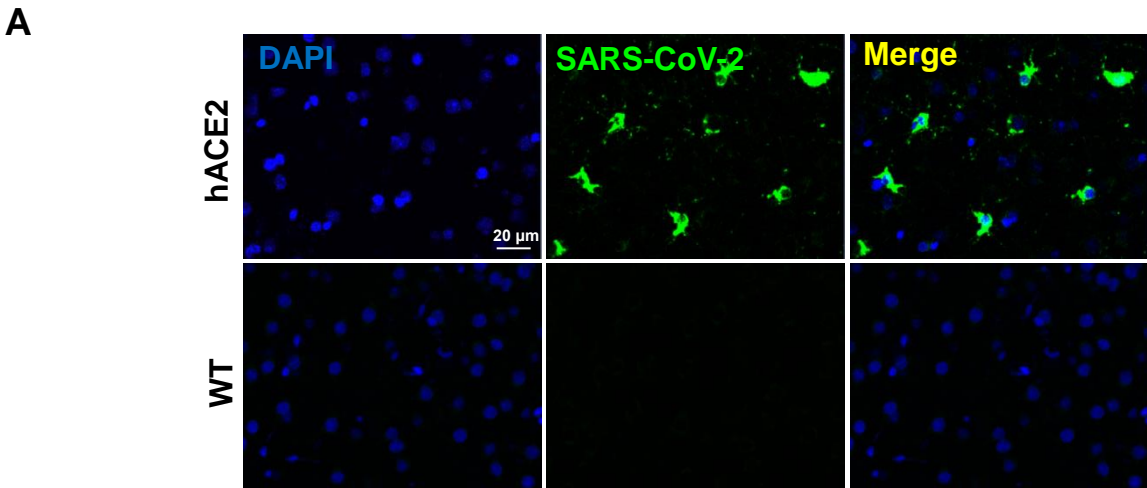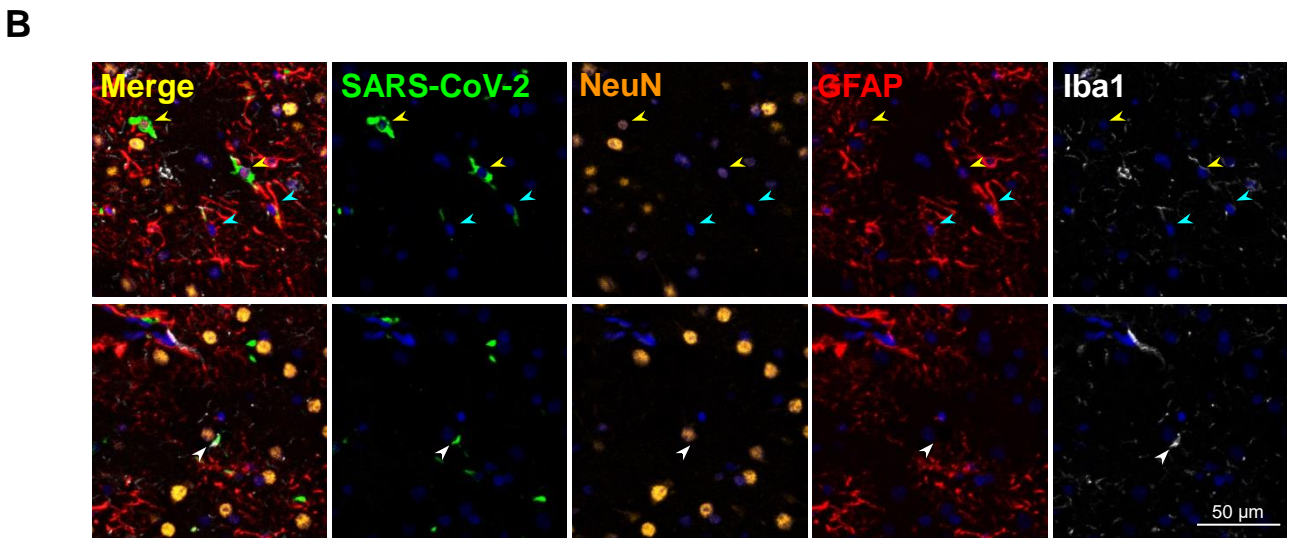

**Figure S2. Immunostaining of brain section in SARS-CoV-2 infected hACE2 mice.** (A) Immunofluorescence staining of mouse brain paraffin sections for SARS-Cov-2 S protein (green) and DAPI (blue). Immunofluorescence staining analysis for the mainly infected cell types in the brain. (B) Immunofluorescence staining of tissue paraffin sections for SARS-Cov-2 S protein (green), neuron marker NeuN (gold), astrocyte marker GFAP (red) and microglial cell marker Iba1 (white). Related to Figure 2.

**Table S1. Cytokine levels in the serum of SARS-CoV-2 infected mice. Related to Figure 3.**

|                 |      | IL-3 | IL-1 $\beta$ | TNF- $\alpha$ | IL-9  | IFN- $\gamma$ | IL-2 | IL-13 | IL-6 | IL-4 | MCP-1 | IL-5 | IL-1 $\alpha$ | G-CSF | RANTES | IL-10 | KC   | IL-17A | GM-CSF | Eotaxin | MIP-1 $\beta$ | IL-12p40 | MIP-1 $\alpha$ | IL-12p70 |
|-----------------|------|------|--------------|---------------|-------|---------------|------|-------|------|------|-------|------|---------------|-------|--------|-------|------|--------|--------|---------|---------------|----------|----------------|----------|
| WT              | NO.1 | 1.6  | 4.1          | 74.9          | 37.5  | 24.7          | 2.4  | 61.5  | 2.6  | 2.1  | 101.0 | 5.5  | 8.3           | 61.0  | 4.3    | 31.1  | 29.9 | 31.8   | 33.8   | 25.8    | 58.1          | 64.4     | 8.4            | 111.1    |
|                 | NO.2 | 3.0  | 7.3          | 112.0         | 43.9  | 26.5          | 4.1  | 98.9  | 3.6  | 3.5  | 136.1 | 10.2 | 11.2          | 55.1  | 7.3    | 58.8  | 34.5 | 27.4   | 43.2   | 19.8    | 45.5          | 45.8     | 7.4            | 136.8    |
|                 | NO.3 | 2.2  | 5.5          | 82.7          | 33.7  | 23.9          | 1.9  | 65.3  | 3.2  | 2.9  | 279.6 | 10.0 | 7.8           | 71.9  | 5.4    | 45.6  | 34.5 | 36.4   | 37.1   | 19.9    | 33.8          | 67.7     | 15.9           | 146.4    |
| hACE2-<br>young | NO.1 | 2.9  | 6.6          | 92.2          | 46.2  | 28.8          | 3.9  | 84.3  | 3.3  | 4.1  | 130.9 | 9.1  | 8.3           | 56.9  | 6.6    | 52.7  | 37.8 | 24.2   | 42.1   | 21.6    | 68.0          | 51.8     | 4.1            | 169.7    |
|                 | NO.2 | 2.1  | 5.3          | 93.1          | 40.4  | 25.4          | 3.3  | 77.4  | 2.9  | 3.1  | 114.3 | 7.8  | 6.0           | 41.7  | 5.1    | 38.8  | 34.0 | 30.4   | 38.6   | 19.5    | 59.6          | 26.4     | 4.2            | 141.2    |
|                 | NO.3 | 1.7  | 4.7          | 69.0          | 37.8  | 22.1          | 2.5  | 61.5  | 2.5  | 2.6  | 105.3 | 6.5  | 5.3           | 45.7  | 3.4    | 39.5  | 30.9 | 30.3   | 36.2   | 15.5    | 51.8          | 37.2     | 3.3            | 140.0    |
| hACE2-<br>aged  | NO.1 | 1.9  | 4.2          | 77.7          | 33.9  | 21.3          | 3.1  | 48.3  | 3.0  | 2.2  | 117.7 | 6.9  | 4.3           | 71.2  | 7.3    | 40.1  | 25.4 | 41.7   | 34.9   | 47.8    | 46.5          | 69.8     | 4.6            | 123.2    |
|                 | NO.2 | 2.2  | 6.5          | 124.5         | 48.3  | 34.0          | 0.7  | 87.8  | 7.5  | 4.1  | 159.8 | 11.0 | 8.3           | 445.9 | 8.5    | 47.4  | 61.7 | 35.3   | 44.8   | 44.8    | 65.9          | 43.5     | 6.0            | 152.5    |
|                 | NO.3 | 4.8  | 14.1         | 184.9         | 203.4 | 161.0         | 6.6  | 143.8 | 6.5  | 6.3  | 276.5 | 13.4 | 9.9           | 114.2 | 13.1   | 83.1  | 64.9 | 31.3   | 66.1   | 106.5   | 174.6         | 83.9     | 9.0            | 210.0    |

**Table S2. Primers and probes used for PCR or qRT-PCR analysis.**

| <b>Primer/Probe name</b> | <b>Primer/Probe sequence</b>      |
|--------------------------|-----------------------------------|
| <b>L-GT-F1</b>           | <b>ggtgatgtaaataattgcccacaggt</b> |
| <b>L-GT-R1</b>           | <b>cacgacattcaacagaccttgatt</b>   |
| <b>R-GT-F1</b>           | <b>taacgttactggccgaagccgctt</b>   |
| <b>R-GT-R1</b>           | <b>ctcagagatggtttcagcaaacagc</b>  |
| <b>ehACE2 F1</b>         | <b>cgaagccgaagacctgttcta</b>      |
| <b>ehACE2 R1</b>         | <b>gggcaagtgtggactgttcc</b>       |
| <b>emACE2-F1</b>         | <b>tccagactccgatcatcaagc</b>      |
| <b>emACE2-R1</b>         | <b>tgctcatggtgttcagaattgt</b>     |
| <b>CoV-F3</b>            | <b>tcctggtgattcttcttcaggt</b>     |
| <b>CoV-R3</b>            | <b>tctgagagaggggtcaagtgc</b>      |
| <b>CoV-P3</b>            | <b>agctgcagcaccagctgtcca</b>      |
